# Supplementary material for: Sub-nanometer sized Cu6(GSH)3 clusters: one-step synthesis and electrochemical detection of glucose
Source: Royal Society of Chemistry journal article supplement (doi:10.1039/c5tc00246j), 2015-01-01
Supplement: c5tc00246j1.pdf [file c5tc00246j1.pdf]

**Electronic Supplementary Information**

**Sub-nanometer sized copper clusters: one-step synthesis and  
electrochemical detection of glucose**

Xiaohui Gao,<sup>a, b</sup> Yizhong Lu,<sup>a, b</sup> Minmin Liu,<sup>a, b</sup> Shuijian He,<sup>a, b</sup> and Wei Chen\*<sup>a</sup>

*<sup>a</sup>State Key Laboratory of Electroanalytical Chemistry, Changchun institute of Applied  
Chemistry, Chinese Academy of Sciences, Changchun 130022, Jilin, China, and*

*<sup>b</sup>University of Chinese Academy of Sciences, Beijing 100039, China*

E-mail: [weichen@ciac.ac.cn](mailto:weichen@ciac.ac.cn)

## Supplementary Results

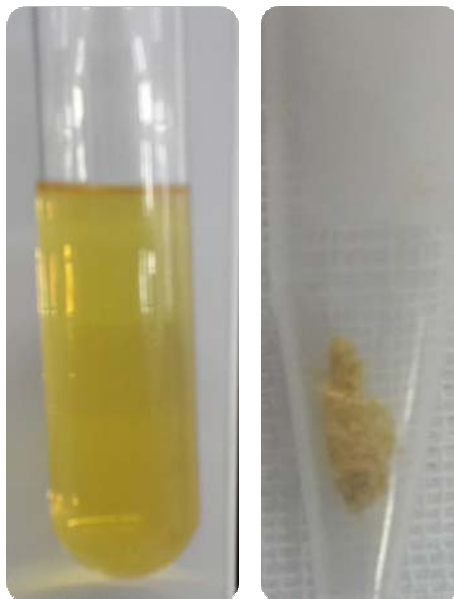

**Fig. S1** Digital photographs of the as-synthesized Cu nanocluster (left: solution; right: solid)

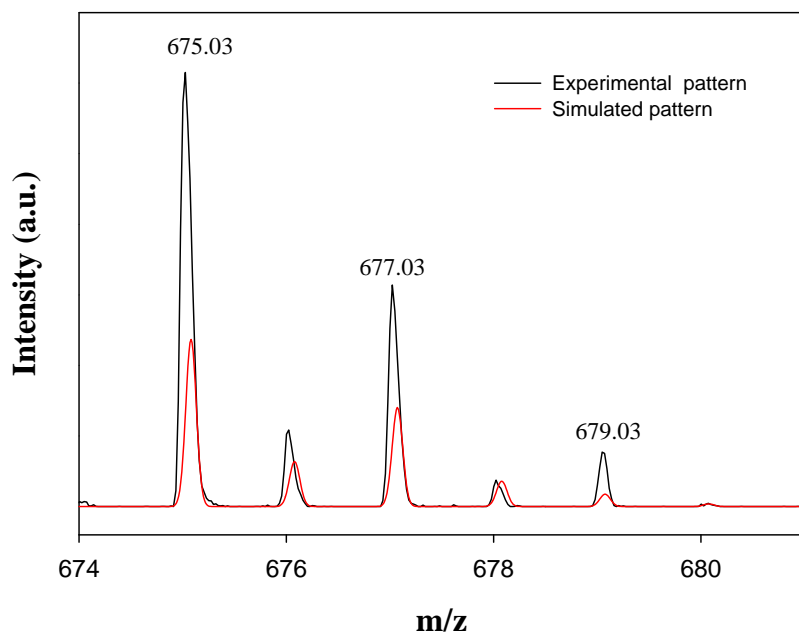

**Fig. S2** The experimental (black curve) and simulated (red curve) isotopic patterns of [Cu(SG)<sub>2</sub>-H]

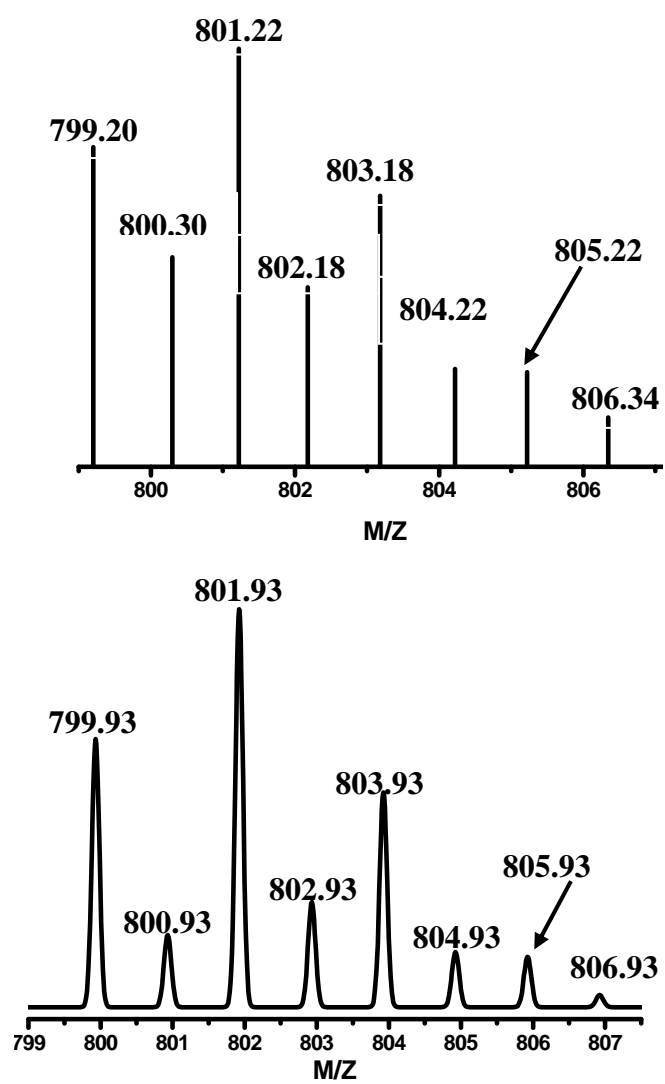

**Fig. S3** The experimental (top) and simulated (bottom) isotopic patterns of  $[\text{Cu}_3(\text{SG})_2]^+$ .

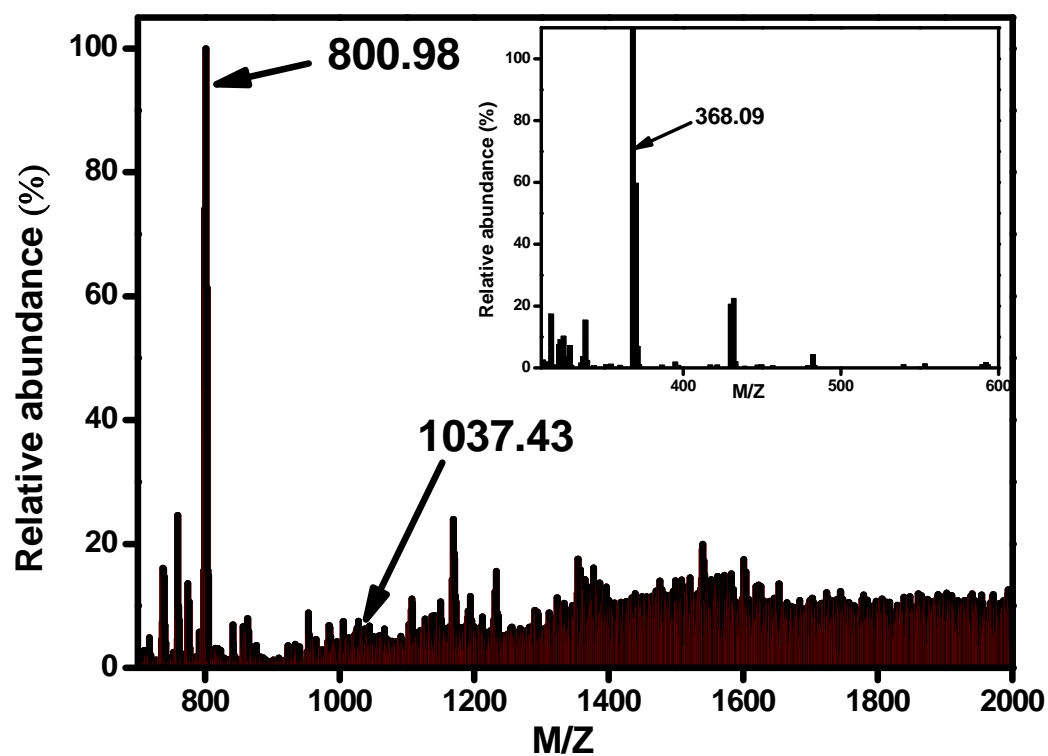

**Fig. S4** The negative-mode ESI-MS of the as-synthesized Cu nanoclusters. Inset displays the lower mass region of the Cu clusters.

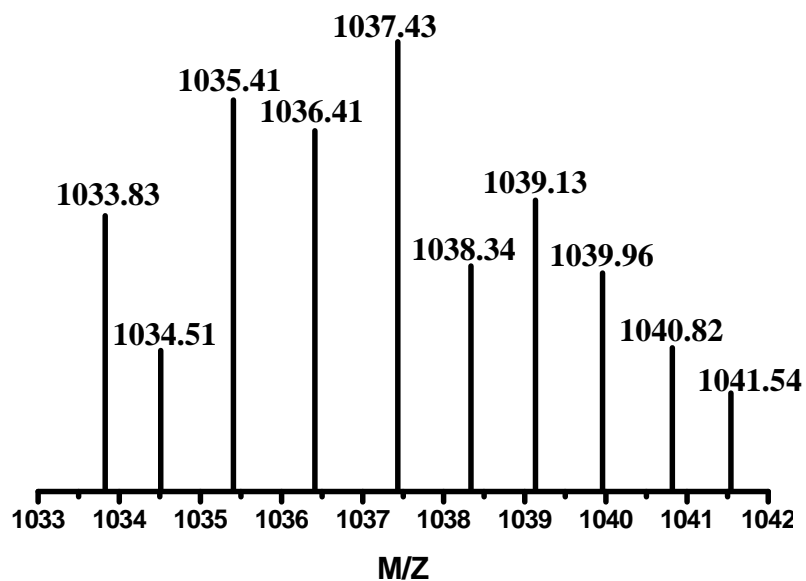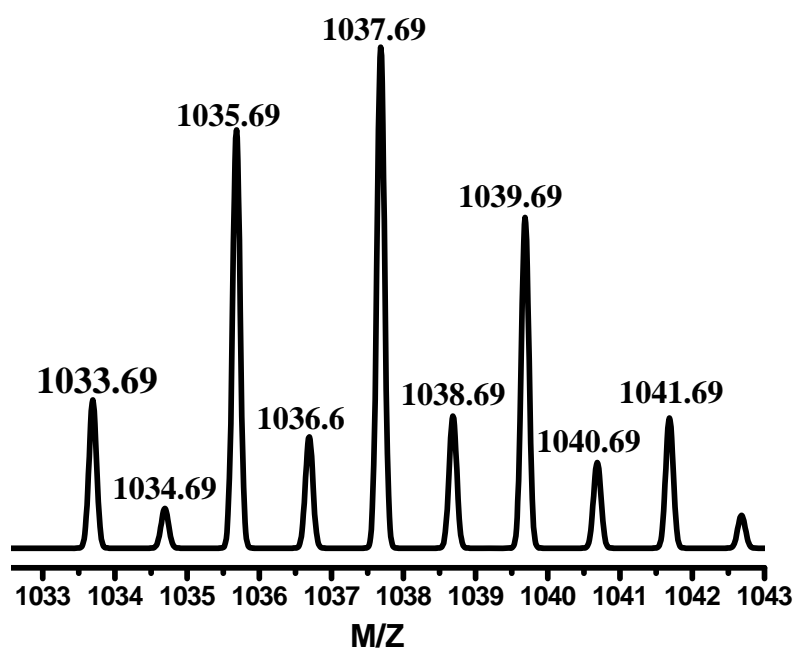

**Fig. S5** The experimental (top) and simulated (bottom) isotopic patterns of  $[\text{Cu}_6(\text{SG})_2+2\text{Na}]^+$ .

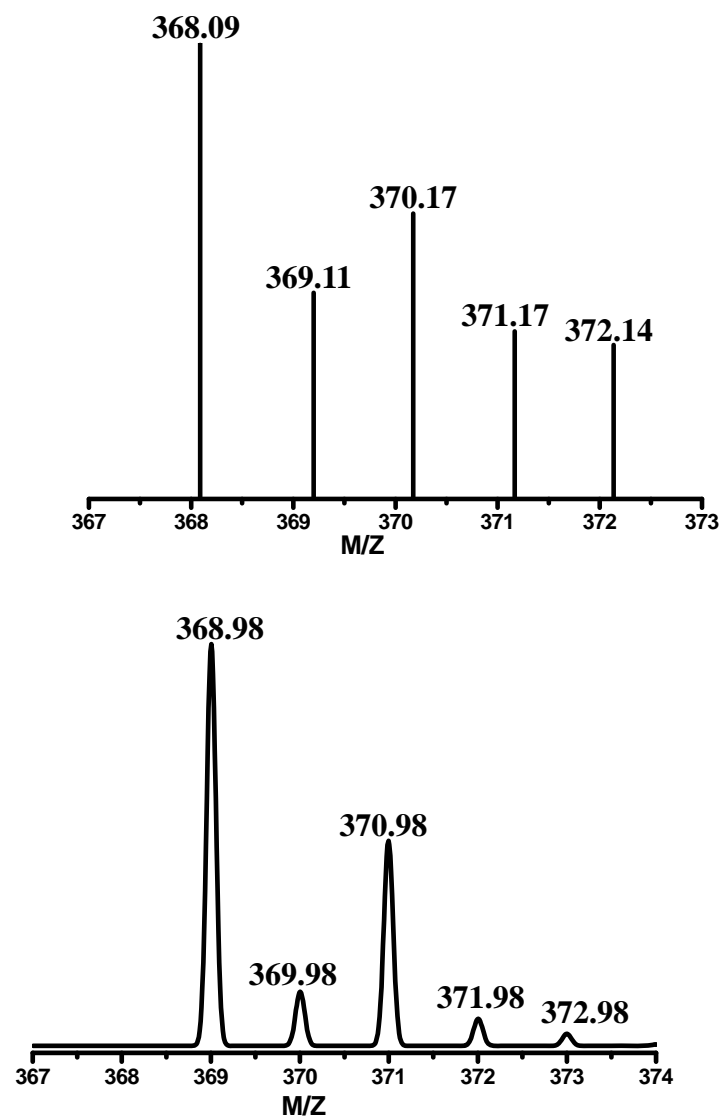

**Fig. S6** The experimental (upper curve) and simulated (down curve) isotopic patterns of  $[\text{Cu}(\text{SG})-\text{H}]^-$ .

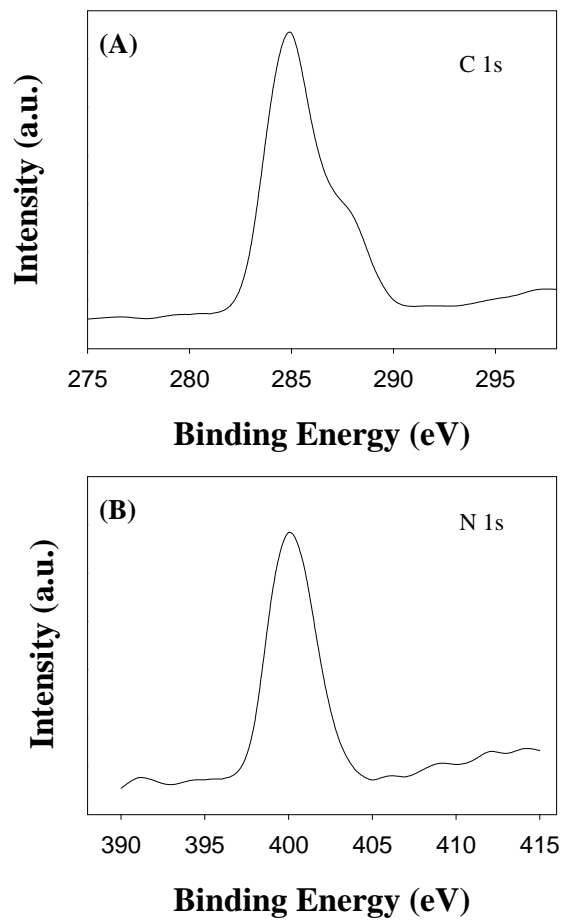

**Fig. S7** XPS spectra of C 1s (A) and N 1s (B) of the as-prepared Cu nanoclusters.



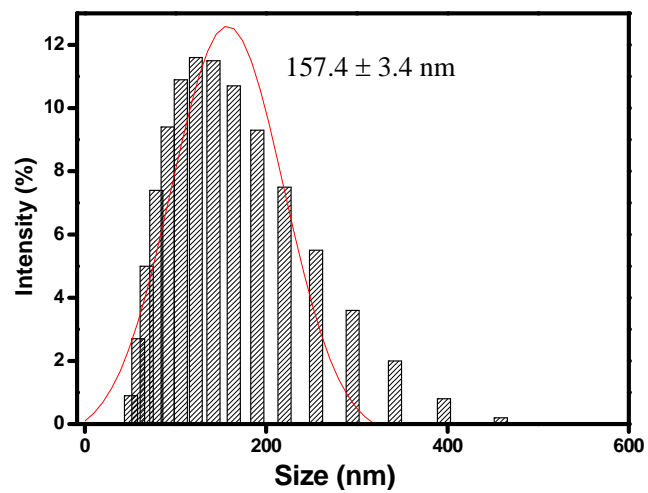

**Fig. S8** Dynamic light scattering (DLS) measurement for the as-prepared Cu nanoparticles.

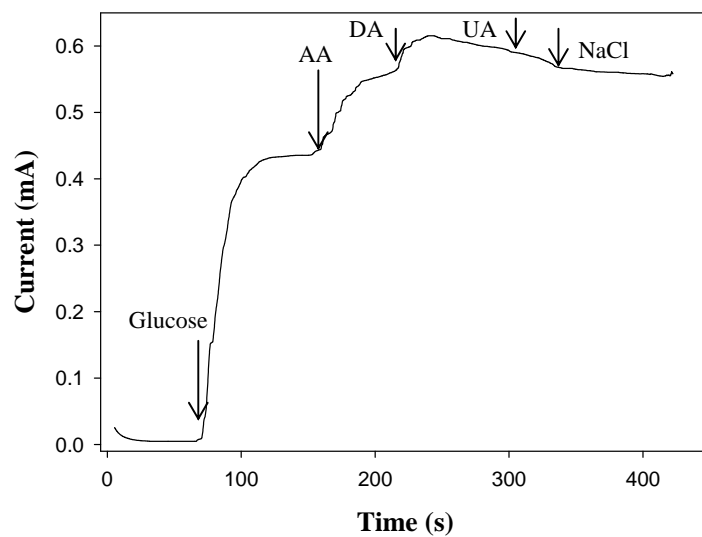

**Fig. S9** Amperometric responses of the Cu NCs/TiO<sub>2</sub>/ITO to the addition of different analytes in 0.1 M KOH.

20 mM glucose, 10 mM ascorbic acid (AA), 10 mM dopamine (DA), 10 mM uric acid (UA) and 10 mM NaCl at 0.5 V.

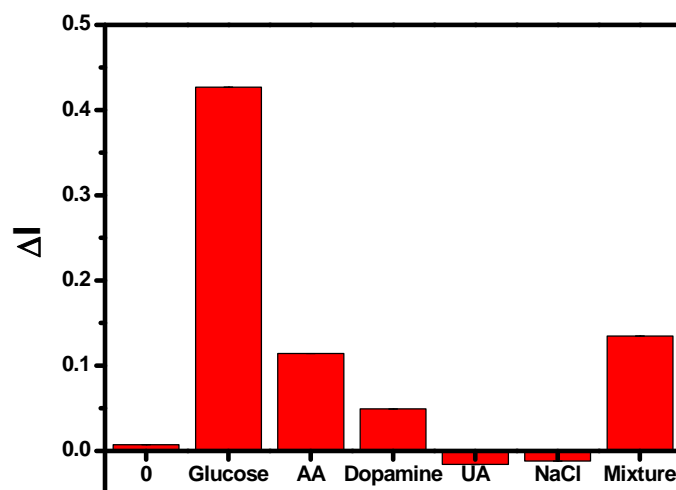

**Fig. S10** The bar diagram from amperometric responses of the Cu NCs/TiO<sub>2</sub>/ITO to the addition of different analytes and their mixture in 0.1 M KOH. 20 mM glucose, 10 mM ascorbic acid (AA), 10 mM dopamine (DA), 10 mM uric acid (UA) and 10 mM NaCl at 0.5 V.
